# Supplementary material for: Autoclaved and Extruded Legumes as a Source of Bioactive Phytochemicals: A Review
Source: MDPI journal article supplement (doi:10.3390/foods10020379), 2021-02-09

**Figure S1.** PRISMA flow diagram for 'autoclaved and extruded legumes as a source of bioactive phytochemicals: a review' manuscript. Diagram from: Moher D, Liberati A, Tetzlaff J, Altman DG, The PRISMA Group (2009). Preferred Reporting Items for Systematic Reviews and Meta-Analyses: The PRISMA Statement. PLoS Med 6(7): e1000097. doi:10.1371/journal.pmed1000097.

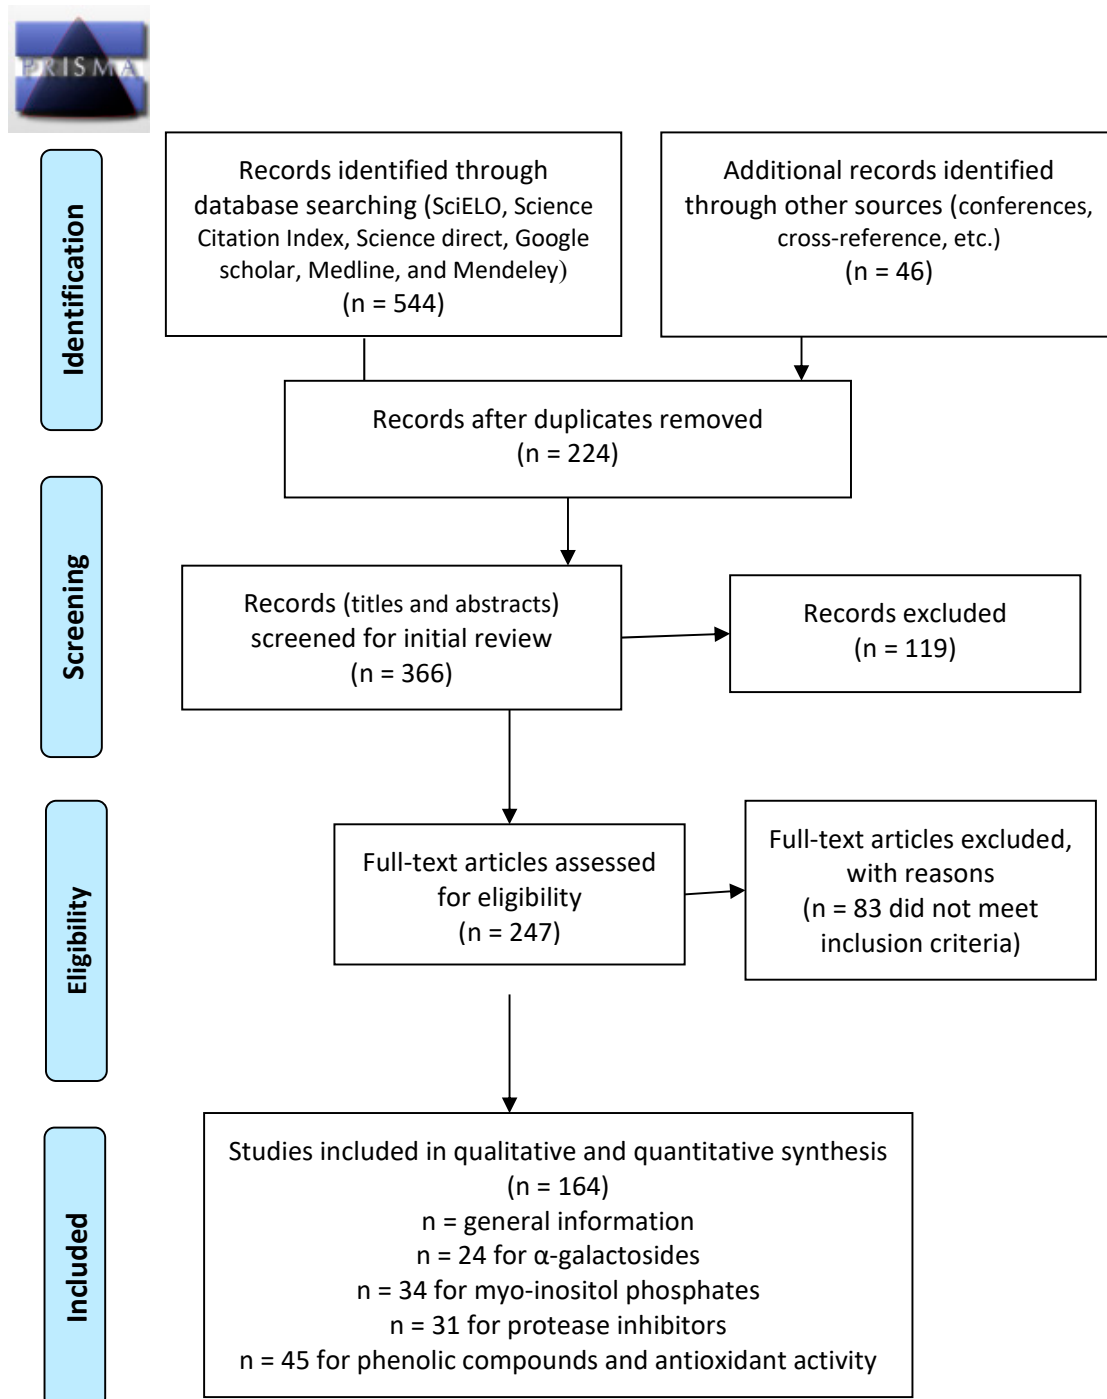

Supplement: s1 [file s1]
